# Supplementary material
Source: Research Square preprint supplement (doi:10.21203/rs.3.rs-8772804/v1)
Supplement: Supplementary file 1 [file 6b3de48edce5c412a64625f6.xlsx]

## Sheet: Table S1
Table S1. List of primers used in the study
Primers for backbone construction
F-AtFT-KpnI	AAGGTACCATGTCTATAAATATAAGAGACC
R-AtFT-SacI	TTGAGCTCCTAAAGTCTTCTTCCTCCGCA
F-FT-gibson	CATACGATGTTCCTGACTAGGTATGTTGTGTGGAATTGTGAGCGG
R-FT-gibson	AGCTTGCATGCCTGCACTAGGGCCAGTGCCAAGCTTGGCG
Primers for CRISPR/Cas9 construction
F-NtDFR-crispr	GATTGTTTGCGTCACTGGAGCAGC
R-NtDFR-crispr	AAACGCTGCTCCAGTGACGCAAAC
Primer for genotyping
F-NtDFR1geno	AGCTGTTCATGCCCCTTCTCC
R-NtDFR1geno	ATCTGTACATTAGGGTCATGCC
F-NtDFR2geno	AGCTGTTCATGCTCCTCCTCC
R-NtDFR2geno	TGACAAGTCCGCTTTCCACAGC
qRT-PCR primer
NtAP1-F	TCAAAGAGGAGGGGAGGTTT
NtAP1-R	CAAGCGTCTCTCTGCGTATG
NtSOC1-F	AGTTGGAGCGGAGTGTCAGT
NtSOC1-R	GCCTTGTCTCTGTTGAAGGC
NtActin-F	AAGGGATGCGAGGATGGA
NtActin-R	CAAGGAAATCACCGCTTTGG
F-qPCR-DFR1	GGAACTGTCGATGTCCAAGAG
R-qPCR-DFR1	TATGATGCTAATGAAATCGATG
F-qPCR-DFR2	CATGCTCCTCCTCCGGTAGCA
R-qPCR-DFR2	TTGTTCTCAGGATCACGAACAG

## Sheet: Table S2
Table S2. Germination rate (Number of seedlings per total seeds)
Line	Rep1	Rep2	Rep3
WT	12/12	18/20	29/30
OX6	10/12	18/20	27/30
OX8	11/12	15/20	25/30
